# Supplementary material for: Lake Tanganyika—A 'Melting Pot' of Ancient and Young Cichlid Lineages (Teleostei: Cichlidae)?
Source: PLoS One. 2015 Apr 30;10(4):e0125043. doi: 10.1371/journal.pone.0125043 (PMC4415804; doi:10.1371/journal.pone.0125043)
Supplement: S1 Table — (XLS) [file pone.0125043.s001.xls]

## Sheet: specimens
Genus	species	group affiliation in this study	formal tribe affiliation	AFLP	ND2	genbank no.	ZSM DNA-bank scan ID
Altolamprologus	calvus	Lamprologini	Lamprologini	x			1039953052
Altolamprologus	calvus	Lamprologini	Lamprologini		x	EF191108.1
Astatoreochromis	alluaudi	ocellated eggspot Haplochromini	Haplochromini	x	x	478445925	1039953613
Astatoreochromis	straelini	ocellated eggspot Haplochromini	Haplochromini	x			1039953131
Astatoreochromis	straelini	ocellated eggspot Haplochromini	Haplochromini		x	KJ176275	1039952560
Aulonocara	baenschi	ocellated eggspot Haplochromini	Haplochromini	x	x	KJ176269	1039953058
Aulonocranus	dewindtii	ancient Tanganyika mouthbrooders	Ectodini	x			1039953049
Aulonocranus	dewindtii	ancient Tanganyika mouthbrooders	Ectodini		x	AY337782.1
Bathybates	sp.	most ancient Tanganyika tribes	Bathybatini	x			1062175334
Bathybates	sp.	most ancient Tanganyika tribes	Bathybatini		x	GQ167832.1
Benthochromis	tricoti	ancient Tanganyika mouthbrooders	Benthochromini	x			1039953226
Benthochromis	tricoti	ancient Tanganyika mouthbrooders	Benthochromini	x			1039953584
Benthochromis	tricoti	ancient Tanganyika mouthbrooders	Benthochromini		x	EU753962.1
Boulengerochromis	microlepis	most ancient Tanganyika tribes	Boulengerochromini	x			1039953595
Boulengerochromis	microlepis	most ancient Tanganyika tribes	Boulengerochromini		x	157284518
Callochromis	macrops	ancient Tanganyika mouthbrooders	Ectodini	x			1039953567
Callochromis	macrops	ancient Tanganyika mouthbrooders	Ectodini		x	AY337795.1
Callochromis	stappersi	ancient Tanganyika mouthbrooders	Ectodini	x			1039953616
Callochromis	stappersi	ancient Tanganyika mouthbrooders	Ectodini		x	AY337775.1
Chalinochromis	sp. 'ndobhoi'	Lamprologini	Lamprologini	x	x	KJ176268	1039953053
Chilochromis	duponti	riverine Austrotilapiines	Tilapiini	x	x	427338244	1062176185
Congolapia	crassa	riverine Austrotilapiines	Tilapiini	x	x	427338276	1039956171
Congolapia	louna	riverine Austrotilapiines	Tilapiini	x	x	427338286	1062174398
Coptodon	rendalli	outgroup	Coptodonini	x	x	20377148
Ctenochromis'	benthicola	ancient Tanganyika mouthbrooders	Cyphotilapiini	x	x	KJ176273	1039953225
Ctenochromis'	horei	Tropheini	Tropheini	x	x	KJ176276	1039953565
Cyathopharynx	furcifer	ancient Tanganyika mouthbrooders	Ectodini	x			1039953562
Cyathopharynx	furcifer	ancient Tanganyika mouthbrooders	Ectodini		x	AY337781.1
Cyclopharynx	schwetzi	serranochromines	no dessignated tribe	x			1039953106
Cyclopharynx	schwetzi	serranochromines	no dessignated tribe		x	407729275	1062177686
Cyphotilapia	gibberosa 'Kigoma'	ancient Tanganyika mouthbrooders	Cyphotilapiini	x	x	KJ176263	1039952540
Cyphotilapia	gibberosa 'Samazi'	ancient Tanganyika mouthbrooders	Cyphotilapiini	x			1039953572
Cyphotilapia	gibberosa 'Samazi'	ancient Tanganyika mouthbrooders	Cyphotilapiini		x	EF679242.1
Cyprichromis	leptosoma	ancient Tanganyika mouthbrooders	Cyprichromini	x			1039953573
Cyprichromis	leptosoma	ancient Tanganyika mouthbrooders	Cyprichromini		x	AB588107.1
Eretmodus	cyanostictus	Eretmodini	Eretmodini	x			1039953559
Eretmodus	cyanostictus	Eretmodini	Eretmodini		x	EF679244.1
Gnathochromis	permaxillaris	ancient Tanganyika mouthbrooders	Limnochromini	x			1039953571
Gnathochromis	permaxillaris	ancient Tanganyika mouthbrooders	Limnochromini		x	AY682522.1
Grammatotria	lemairii	ancient Tanganyika mouthbrooders	Ectodini	x			1039953578
Grammatotria	lemairii	ancient Tanganyika mouthbrooders	Ectodini		x	AY337787.1
Haplochromis	burtoni	ocellated eggspot Haplochromini	Haplochromini	x	x	KJ176257	1039953586
Haplochromis	polli	serranochromines	no dessignated tribe	x			1062177695
Haplochromis	polli	serranochromines	no dessignated tribe		x	EU753941.1
Haplochromis'	callipterus	ocellated eggspot Haplochromini	Haplochromini	x			1039952538
Haplochromis'	callipterus	ocellated eggspot Haplochromini	Haplochromini		x	EU753934.1
Haplochromis'	desfontainesii	ocellated eggspot Haplochromini	Haplochromini	x	x	407729225	1062176273
Haplochromis'	fasciatus	serranochromines	no dessignated tribe	x	x
Haplochromis'	flaviijosephi	ocellated eggspot Haplochromini	Haplochromini	x			1062174448
Haplochromis'	paludinosus	ocellated eggspot Haplochromini	Haplochromini	x	x	KJ176274	1062174221
Haplochromis'	sp. 'Kwango'	serranochromines	no dessignated tribe	x	x	KJ176258	1039953140
Haplochromis	brauschi	serranochromines	no dessignated tribe	x	x	KJ176283	1039953101
Haplochromis	callichromis	serranochromines	no dessignated tribe	x	x	407729273	1039953102
Haplotaxodon	microlepis	ancient Tanganyika mouthbrooders	Perissodini	x			1039953598
Haplotaxodon	microlepis	ancient Tanganyika mouthbrooders	Perissodini		x	EF679246.1
Hemibates	stenosoma	most ancient Tanganyika tribes	Hemibatini	x			1062175332
Hemibates	stenosoma	most ancient Tanganyika tribes	Hemibatini		x	AY663718.1
Interochromis	loocki	Tropheini	Tropheini	x			1039952548
Interochromis	loocki	Tropheini	Tropheini		x	GQ995741.1
Julidochromis	dickfeldi	Lamprologini	Lamprologini	x			1039953569
Julidochromis	dickfeldi	Lamprologini	Lamprologini		x	HM623790.1
Lamprologus	tigripictilis	Lamprologini	Lamprologini	x			1039953092
Lamprologus	tigripictilis	Lamprologini	Lamprologini		x	HM101444.1
Lepidiolamprologus	lemairii	Lamprologini	Lamprologini	x	x	KJ176261	1039952527
Lepidiolamprologus	nkambae	Lamprologini	Lamprologini	x	x	KJ176260	1039953547
Limnochromis	staneri	ancient Tanganyika mouthbrooders	Limnochromini	x			1039953592
Limnochromis	staneri	ancient Tanganyika mouthbrooders	Limnochromini		x	AY682542.1
Melanochromis	auratus	ocellated eggspot Haplochromini	Haplochromini	x			1039953612
Melanochromis	auratus	ocellated eggspot Haplochromini	Haplochromini		x	AY930069.1
Neolamprologus	brichardi	Lamprologini	Lamprologini	x			1039952542
Neolamprologus	brichardi	Lamprologini	Lamprologini		x	EF679251.1
Neolamprologus	signatus	Lamprologini	Lamprologini	x	x	KJ176262	1039952539
Neolamprologus	tetrocephalus	Lamprologini	Lamprologini	x	x	KJ176264	1039953577
New Kalungwishi cichlid'		Pseudocrenilabrus group	no dessignated tribe	x	x	478445913	1062177718
Ophthalmotilapia	ventralis	ancient Tanganyika mouthbrooders	Ectodini	x	x	KJ176267	1039953593
Oreochromis	tanganicae	outgroup	Oreochromini	x	x	256013278	1039953548
Oreochromis	tanganicae	outgroup	Oreochromini	x			1039952535
Orthochromis	malagaraziensis	Malagarasi Orthochromis	no dessignated tribe	x	x	AY930056.1
Orthochromis	uvinzae	Malagarasi Orthochromis	no dessignated tribe	x			1062175346
Orthochromis	uvinzae	Malagarasi Orthochromis	no dessignated tribe		x	AY930048.1
Orthochromis'	kalungwishiensis	Northern-Zambian-Orthochromis	no dessignated tribe	x	x	KJ176256	1062177710
Orthochromis'	polyacanthus	LML-Orthochromis	no dessignated tribe	x	x	478445927
Orthochromis'	sp. aff. kalungwishiensis	Northern-Zambian-Orthochromis	no dessignated tribe	x	x	407729205	1054250151
Orthochromis'	stormsi	LML-Orthochromis	no dessignated tribe	x	x	407729195	ZSM 38129
Orthochromis'	torrenticola	serranochromines	no dessignated tribe	x	x	407729291	1062177691
Paracyprichromis	nigripinnis	ancient Tanganyika mouthbrooders	Cyprichromini	x			1039953549
Paracyprichromis	nigripinnis	ancient Tanganyika mouthbrooders	Cyprichromini		x	AY740339.1
Perissodus	microlepis	ancient Tanganyika mouthbrooders	Perissodini	x			1039953227
Perissodus	microlepis	ancient Tanganyika mouthbrooders	Perissodini		x	EF679255.1
Petrochromis	trewavasae	Tropheini	Tropheini	x			1039953582
Petrochromis	trewavasae	Tropheini	Tropheini		x	GQ995761.1
Pharyngochromis	acuticeps	serranochromines	no dessignated tribe	x			1039953112
Pharyngochromis	acuticeps	serranochromines	no dessignated tribe		x	AY930094.1
Pharyngochromis'	sp. 'white tip'	serranochromines	no dessignated tribe	x	x	407729299
Pharyngochromis'	sp. 'yellow lips'	serranochromines	no dessignated tribe	x			1062175814
Pharyngochromis'	sp. 'yellow lips'	serranochromines	no dessignated tribe		x	407729297	1062175813
Pseudocrenilabrus	multicolor	Pseudocrenilabrus group	no dessignated tribe	x	x	KJ176280	1039952547
Pseudocrenilabrus	nicholsi	Pseudocrenilabrus group	no dessignated tribe	x			1062175330
Pseudocrenilabrus	nicholsi	Pseudocrenilabrus group	no dessignated tribe		x	AY602994.1
Pseudocrenilabrus	philander 'Spitzkopdam'	Pseudocrenilabrus group	no dessignated tribe	x	x	KJ176281	1039953088
Pseudocrenilabrus	sp. 'Kalungwishi'	Pseudocrenilabrus group	no dessignated tribe	x	x	478445907	1062177721
Pseudotropheus	elongatus	Tropheini	Tropheini	x	x	KJ176270	1039952550
Reganochromis	calliurus	ancient Tanganyika mouthbrooders	Limnochromini	x			1039953543
Reganochromis	calliurus	ancient Tanganyika mouthbrooders	Limnochromini		x	AY682544.1
Rhamphochromis	sp. 'yellow fins'	ocellated eggspot Haplochromini	Haplochromini	x	x	407729221	1039952551
Sciaenochromis	fryeri	ocellated eggspot Haplochromini	Haplochromini	x			1039953073
Sciaenochromis	fryeri	ocellated eggspot Haplochromini	Haplochromini		x	407729223	ZSM 40008
Serranochromis	altus	serranochromines	no dessignated tribe	x	x	KJ176282	1039953118
Serranochromis	robustus	serranochromines	no dessignated tribe	x			1039953119
Serranochromis	robustus	serranochromines	no dessignated tribe		x	EF393712.1
Simochromis	pleurospilus	Tropheini	Tropheini	x	x	KJ176259	1039953107
Spathodus	erythrodon	Eretmodini	Eretmodini	x			1039953594
Spathodus	erythrodon	Eretmodini	Eretmodini		x	AF317267.1
Spathodus	marlieri	Eretmodini	Eretmodini	x			1039953596
Spathodus	marlieri	Eretmodini	Eretmodini		x	HM623786.1
Steatocranus	bleheri	riverine Austrotilapiines	Steatocranini	x	x	256013292	1039953093
Steatocranus	sp. 'dwarf'	riverine Austrotilapiines	Steatocranini	x			1062174171
Steatocranus	sp. 'dwarf'	riverine Austrotilapiines	Steatocranini		x	256013302	1062174171
Steatocranus	sp. 'redeye'	riverine Austrotilapiines	Steatocranini	x	x	KJ176279	1039953090
Steatocranus	tinanti	riverine Austrotilapiines	Steatocranini	x	x	256013304	1039953091
Tanganicodus	irsacae	Eretmodini	Eretmodini	x	x	KJ176271	1062174173
Telmatochromis	temporalis	Lamprologini	Lamprologini	x	x	KJ176266	1039953580
Tilapia	ruweti	riverine Austrotilapiines	Tilapiini	x	x	KJ176278	1039953087
Tilapia	sparrmanii	riverine Austrotilapiines	Tilapiini	x	x	KJ176277	1039953089
Trematocara	cf. variabile	most ancient Tanganyika tribes	Trematocarini	x	x	KJ176272	1062174172
Trematocara	marginatum	most ancient Tanganyika tribes	Trematocarini	x	x	478445989	1039953161
Triglachromis	otostigma	ancient Tanganyika mouthbrooders	Limnochromini	x			1039952526
Triglachromis	otostigma	ancient Tanganyika mouthbrooders	Limnochromini		x	AY337769.1
Tropheus	duboisi	Tropheini	Tropheini	x			1039953550
Tropheus	duboisi	Tropheini	Tropheini		x	GQ995809.1
Tropheus	moorii 'Moliro'	Tropheini	Tropheini	x	x	KJ176265	1039953579
Variabilichromis	moorii	Lamprologini	Lamprologini	x			1039953583
Variabilichromis	moorii	Lamprologini	Lamprologini		x	GQ167833.1
Xenotilapia	flavipinnis	ancient Tanganyika mouthbrooders	Ectodini	x			1039953587
Xenotilapia	flavipinnis	ancient Tanganyika mouthbrooders	Ectodini		x	AY337794.1
